# Supplementary material for: A scoping review of the format, content, effectiveness and acceptability of reproductive life planning tools
Source: medRxiv preprint, doi:10.1101/2024.05.31.24308272, version 1 (2024-06-01)
Supplement: S1 [file 308272_file04.docx]

**Searches**

**Query String (Ovid)**

"reproductive life plan$" OR "reproductive plan$" OR "pregnancy intention screening"

**Medline(R) via Ovid** (Search date: 24 Oct 2023, 233 results)

Search limit: Humans, English Language, Remove Preprint Records, Publication Date Limit to 2015 onwards, Publication Type Limit to Journal Article OR Review OR Systematic Review

**Embase via Ovid** (Search date: 24 Oct 2023, 44 results)

Search limit: Human, English Language, Remove Preprint Records, Remove Medline Records, Publication Date Limit to 2015 onwards, Publication Type Limit to Article OR Conference Paper OR Conference Review OR Review

**PsycINFO via Ovid** (Search date: 24 Oct 2023, 9 results)

Search limit: Human, Remove MEDLINE Records, English Language, Limit Publication Types to Peer Reviewed Journal, Limit Document Types to Journal Articles, Publication Date Limit to 2015 onwards.

**Scopus vis Scopus** (Search date: 02 Nov 2023, 146 results)

Query String: TITLE-ABS-KEY ( "reproductive life plan$" OR "reproductive plan$" OR "pregnancy intention screening" ) AND PUBYEAR > 2014 AND PUBYEAR < 2024 AND ( LIMIT-TO ( DOCTYPE , "ar" ) OR LIMIT-TO ( DOCTYPE , "re" ) OR LIMIT-TO ( DOCTYPE , "cp" ) ) AND ( LIMIT-TO ( LANGUAGE , "English" ) ) AND ( LIMIT-TO ( SRCTYPE , "j" ) ) AND ( LIMIT-TO ( PUBSTAGE , "final" ) ) AND ( LIMIT-TO ( SUBJAREA , "MEDI" ) OR LIMIT-TO ( SUBJAREA , "SOCI" ) OR LIMIT-TO ( SUBJAREA , "NURS" ) OR LIMIT-TO ( SUBJAREA , "PSYC" ) OR LIMIT-TO ( SUBJAREA , "NEUR" ) OR LIMIT-TO ( SUBJAREA , "MULT" ) OR LIMIT-TO ( SUBJAREA , "HEAL" ) )

**Search total**

432 results

Post dedup 297
